# Supplementary material
Source: ML conference proceedings conference paper supplement (https://openreview.net/forum?id=uqxBTcWRnj)
Supplement: supplementary_material [file attachment]

**Description:** This dataset contains images that are generated by AIs that try to decompose symbols into strokes, a stroke is a single movement drawing on the surface while keeps contacting the surface. *E.g.*,  $\pi$  can be decomposed into 3 strokes  (in 3 colors).

**Task:** In each image, different strokes are marked with different colors, the same color means one stroke. Imagine AI is learning to draw a symbol by strokes and your task is to rate it, you can draw the symbol with these strokes in your brain, then rate it with the following **ratings**:

1. **Non-stroke:** not strokes at all, impossible to draw the symbol with them, **examples:**

 : This one regards the whole  $\pi$  as one single stroke which is impossible (not consider cursive writing, even cursive writing need some supportive connections)

 : This one includes non-continuous strokes (blue and purple) that should be regarded as multiple strokes (e.g. the purple one should be two strokes)

 : This one includes a stroke that is impossible to draw (the cyan part)

**\*Note that we allow AI to make little mistakes, examples:**

 : This cyan part looks like the above, however, the protrude is small and ignorable

 : The red part is non-continuous, but just a small dot, so we may ignore it

2. **Unnatural:** can draw with these strokes, but unnatural or uncomfortable, **examples:**

 : theoretically, a  $\pi$  can be drawn with these two strokes, but in practice, if you draw this way, drawing this way will be uncomfortable or hard to draw a good-looking one

 : AI decomposes strokes into multiple unnatural segments

3. **Acceptable:** The strokes are not ideal enough, but not that unnatural, **examples:**

 : it makes one mistake, but already close as we allow little mistakes

 : although humans don't write F in this way, it is still reasonable

 : we can write M in one stroke, but it is acceptable

4. **Good:** The strokes are close to the one human will use, **examples:**

 : this is how humans write  $\pi$

 : although we can draw A with 2 strokes, 3 strokes is also right
